# Supplementary material
Source: publisher figshare collection journal article supplement (https://tandf.figshare.com/ndownloader/files/22527482)
Supplement: Supplementary file 1 [file 22527482]

**Table A1**. Summary statistics of variables obtained from questionnaire and driving simulator

| Variable | Description/Categories | Mean | SD | % |
| --- | --- | --- | --- | --- |
| 1. **Variables obtained from the questionnaire** | | | | |
| Age | Drivers’ age in years | 24.96 | 3.91 |  |
| Gender | Male |  |  | 75.6 |
| Female* | 24.4 |
| BMI | Body Mass Index (kg/m2) | 23.66 | 3.20 |  |
| Experience | Driving experience in years | 5.07 | 3.40 |  |
| Education | Post graduate |  |  | 45.1 |
| Graduate | 51.2 |
| Pre-university* | 3.7 |
| Crash history | Yes |  |  | 9.8 |
| No* | 90.2 |
| Awareness about DUI laws# | Yes |  |  | 73.2 |
| No* | 26.8 |
| Frequency of alcohol consumption | Often (more than twice a week) |  |  | 11.0 |
| Sometimes (once or twice a week) | 25.6 |
| Rarely (at most once a week)* | 63.4 |
| 1. **Variables obtained from the driving simulator** | | | | |
| **Variable** | **Description** | **Minimum** | **Maximum** | **Mean** |
| Speed limit violation | How many times the vehicle violated the speed limit (per trial) | 0 | 18 | 3.6 |
| Lane excursions | How many times the vehicle crossed the outer road lines (per trial) | 0 | 14 | 0.8 |
| Low RPM× | How many times RPM value of vehicle was less than 1000 (per trial) | 0 | 25 | 7.7 |
| High RPM× | How many times RPM value of vehicle exceeded 5000 (per trial) | 0 | 12 | 2.9 |

* Reference category, #DUI = Driving under influence, ×RPM = Rounds per minute
